# Supplementary material
Source: publisher figshare collection journal article supplement (https://springernature.figshare.com/ndownloader/files/18091730)
Supplement: Supplementary file [file 18091730]

## Two putative MmpL homologs contribute to antimicrobial resistance and nephropathy of enterohaemorrhagic *E. coli* O157:H7

---

Salma H. Hussein, Reham Samir, Ramy K. Aziz, Mohamed A. Toama

Department of Microbiology and Immunology, Faculty of Pharmacy, Cairo University, 11562 Cairo, Egypt

### Additional File Contents:

- **Additional Tables:**

Table S1: Bacterial strains used in this study

Table S2: List of primers used in this study

- **Additional Figures:**

Figure S1: Transcriptional changes of the *z4861* and *yegN* mutants grown in MSM with and without ciprofloxacin

Figure S2: SDS-PAGE analysis of WT,  $\Delta z4861$  and  $\Delta yegN$  culture supernatants.

Figure S3: Attachment assay on Caco-2 cell line

Figure S4: Biofilm assay of the five strains

**Table S1: Bacterial strains used in this study**

| Strain                                 | Genotype or description                                                                                            | Source or reference                           |
|----------------------------------------|--------------------------------------------------------------------------------------------------------------------|-----------------------------------------------|
| <i>Escherichia coli</i> O157:H7 EDL933 | Wild type (WT)                                                                                                     | [1]                                           |
| WT/pKD46                               | WT containing lambda phage plasmid pKD46; ampicillin resistant.                                                    | This study                                    |
| $\Delta z4861$                         | Isogenic mutant of WT lacking <i>z4861</i> gene; kanamycin resistant.                                              | This study                                    |
| $\Delta yegN$                          | Isogenic mutant of WT lacking <i>yegN</i> gene; kanamycin resistant.                                               | This study                                    |
| $\Delta yegN \Delta kan$               | Isogenic mutant of WT lacking <i>yegN</i> gene and <i>kanamycin</i> insert.                                        | This study                                    |
| $\Delta yegN \Delta kan/pKD46$         | Isogenic mutant of WT lacking <i>yegN</i> gene and carrying lambda phage plasmid pKD46; ampicillin resistant       | This study                                    |
| $\Delta z \Delta y$                    | <i>yegN</i> and <i>z4861</i> (double) mutant of WT lacking both <i>z4861</i> and <i>yegN</i> ; kanamycin resistant | This study                                    |
| <i>E. coli</i> clinical samples        | Isolated from various hospitals and clinics                                                                        | Department of Microbiology Culture Collection |

**Table S2: List of primers used in this study**

| Name   | Site of binding                | Sequence                                                                                                | Note                                                   | Source     |
|--------|--------------------------------|---------------------------------------------------------------------------------------------------------|--------------------------------------------------------|------------|
| K1'    | Kanamycin cassette             | 5' -CCAGTCATAGCCGAATAGCCT-3'                                                                            | Screening for the kanamycin cassette in the chromosome | [2]        |
| K2     | Kanamycin cassette             | 5' -CGGTGCCCTGAATGAACTGC-3'                                                                             |                                                        | [3]        |
| Kt     | Kanamycin cassette             | 5' -CGGCCACAGTCGATGAATCC-3'                                                                             |                                                        |            |
| SH_001 | <i>Z4861</i>                   | 5' -CCTGCTGCCGCAATCACG-3'                                                                               | Transcriptional analysis of <i>z4861</i>               | This study |
| SH_002 | <i>z4861</i>                   | 5' -CGGCATCCATTGGCCCTTTA-3'                                                                             |                                                        | This study |
| SH_003 | <i>yegN</i>                    | 5' -CCCGTCGCGCCTGTTTATT-3'                                                                              | Transcriptional analysis of <i>yegN</i>                | This study |
| SH_004 | <i>yegN</i>                    | 5' -GCCAGACATCTGCCCGAAC-3'                                                                              |                                                        | This study |
| SH_005 | Upstream <i>z4861</i>          | 5' -<br>GCGATCGCACCAGATATTGCTCTTACCCAAC<br>ATCAACTGACGCCAGCGCAACTGACCGATG<br>attccggggatccgctcgacc-3' * | Formation of <i>z4861</i> knockout insert              | This study |
| SH_006 | Downstream <i>z4861</i>        | 5' -<br>AGCCGGTGAGGATAAGCGTAGCGGTCAGGG<br>CGAACGCTCGCCAGAATGTGGATTTGATCA<br>gtgtaggctggagctgcttc-3' *   |                                                        | This study |
| SH_007 | Upstream <i>yegN</i>           | 5' -<br>CACTCCGGAAGAGAAAGCCACCAGCCGCGA<br>ATACGCGAAAAAAGGAGCTCGCTCCTGATG<br>attccggggatccgctcgacc-3' *  | Formation of <i>yegN</i> knockout insert               | This study |
| SH_008 | Downstream <i>yegN</i>         | 5' -<br>GACCGACAGTAAATCGTCGCCACCGGGCG<br>GTAAATGAAGAGGGCAAAAACTTCACTTA<br>gtgtaggctggagctgcttc-3' *     |                                                        | This study |
| SH_009 | 150 bp upstream <i>z4861</i>   | 5' -TCAACACCATCGATCTCGCC-3'                                                                             | Confirmatory primers for <i>z4861</i> deletion         | This study |
| SH_010 | 150 bp downstream <i>z4861</i> | 5' -GATGCGCGTGCCAGGTTG-3'                                                                               |                                                        | This study |
| SH_011 | 150 bp upstream <i>yegN</i>    | 5' -CATTGATCGCCTGACCGAAG-3'                                                                             | Confirmatory primers for                               | This study |

| Name            | Site of binding               | Sequence                     | Note                           | Source     |
|-----------------|-------------------------------|------------------------------|--------------------------------|------------|
| SH_012          | 150 bp downstream <i>yegN</i> | 5' -GCAGCATACGGAAACCCAGTA-3' | <i>yegN</i> deletion           | This study |
| SH_013          | <i>z486l</i> fw               | 5' -GATGGACGGTTGGCTGGTGA-3'  | <i>z486l</i> samples screening | This study |
| SH_014          | <i>z486l</i> Rev              | 5' -TGAGCAGCGCCAGTAGCAA-3'   |                                | This study |
| SH_015          | <i>yegN</i> Fw                | 5' -TGCGGTGCAGGCAATTATGG-3'  | <i>yegN</i> samples screening  | This study |
| SH_016          | <i>yegN</i> Rev               | 5' -GCCGACCATGCCGATACCTAA-3' |                                | This study |
| <i>ihfB</i> Fw  |                               | 5' -GATAGAAAGACTTGCCACCCA-3' | House Keeping gene             | [4]        |
| <i>ihfB</i> Rev |                               | 5' -CCAGTTCTACTTTATCGCCAG-3' |                                |            |

\* Nucleotides shown in lowercase represent the sequence homologous to the pKD46 plasmid, but not the target strain genome

**Figure S1:**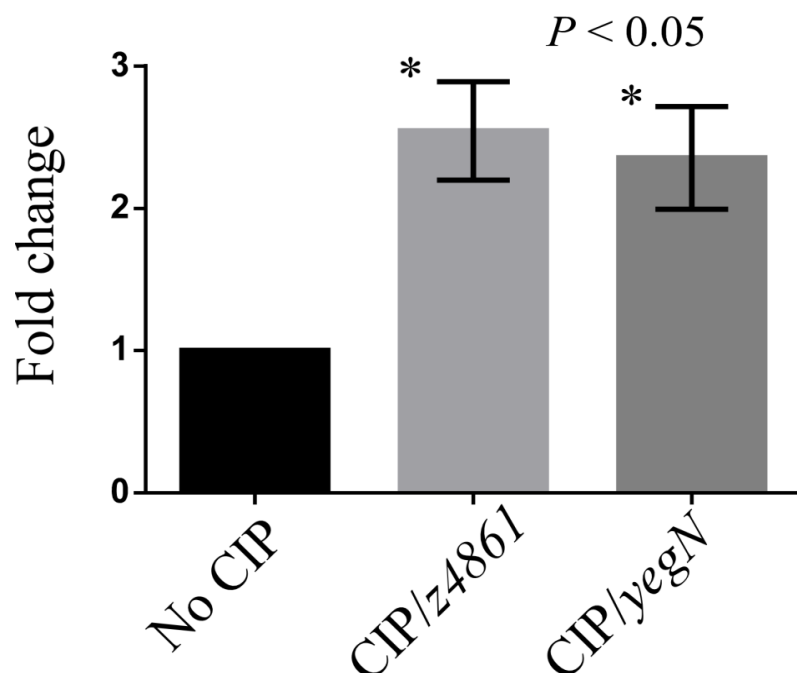**Figure S1: Transcriptional changes of the *z4861* and *yegN* mutants grown in MSM with and without ciprofloxacin.**

Fold change in the transcription levels of the *z4861* and *yegN* genes in both absence and presence of ciprofloxacin: A significant increase of 2.3-2.8 fold (in case of *z4861*) and 2.1-2.6 fold (in case of *yegN*) is observed when either mutant is grown in presence of ciprofloxacin. The data represent the mean of two independent experiments (each one was done in duplicates), and the error bars represent the standard deviation (SD).

**Figure S2:**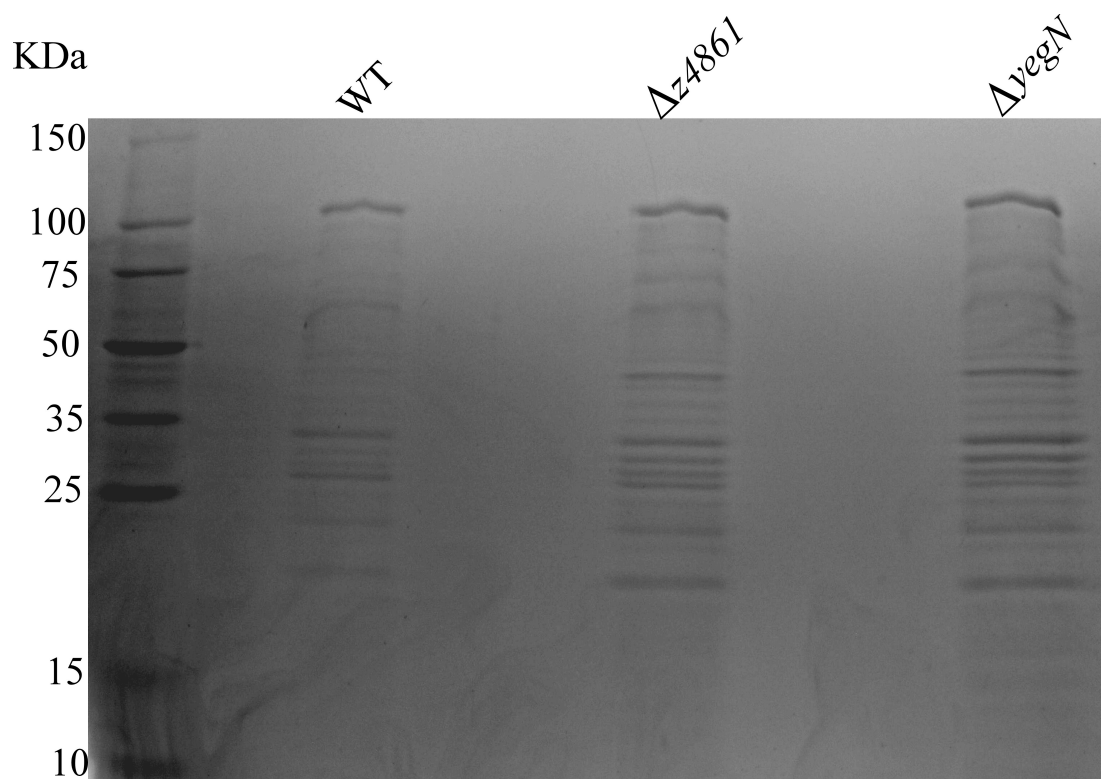

**Figure S2: SDS-PAGE analysis of WT,  $\Delta z4861$  and  $\Delta yegN$  culture supernatants.**

A 15% SDS-polyacrylamide gel showing the concentrated proteins for WT,  $\Delta z4861$  and  $\Delta yegN$ . No major differences could be visually detected between the analyzed secretomes.

**Figure S3:**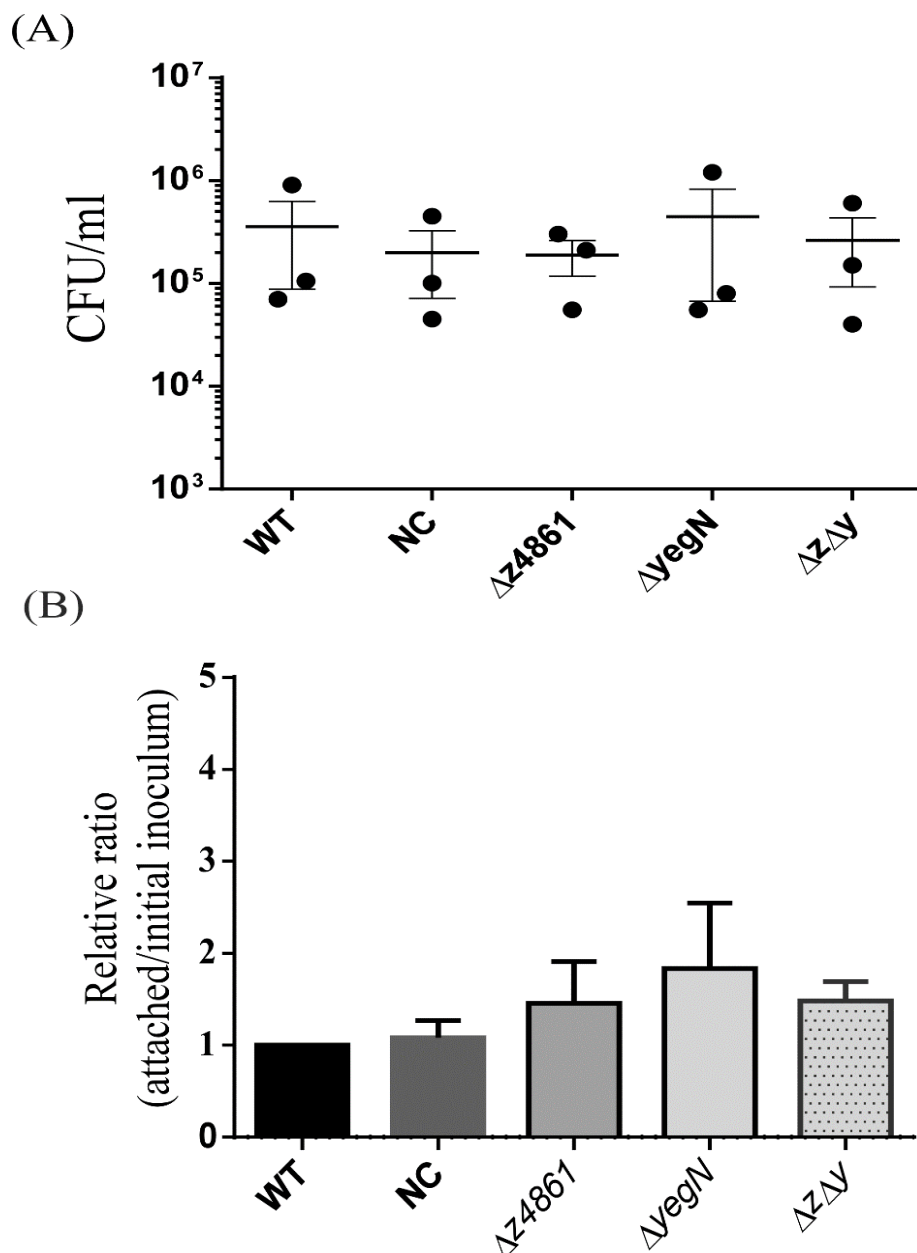**Figure S3: Attachment assay on Caco-2 cell line.**

**A.** Graph of  $\log_{10}$  CFU of recovered attached cells on Caco-2 cells for each strain. It shows no significant difference among the recovered cells for each strain ( $P > 0.05$ ). **B.** Column chart comparing the ratio of recovered attached cells per initial inoculum of WT to that of each strain. The WT is given a default value of 1. No significant difference was found among the strains. The significance was determined by paired Student's t-test.

**Figure S4:**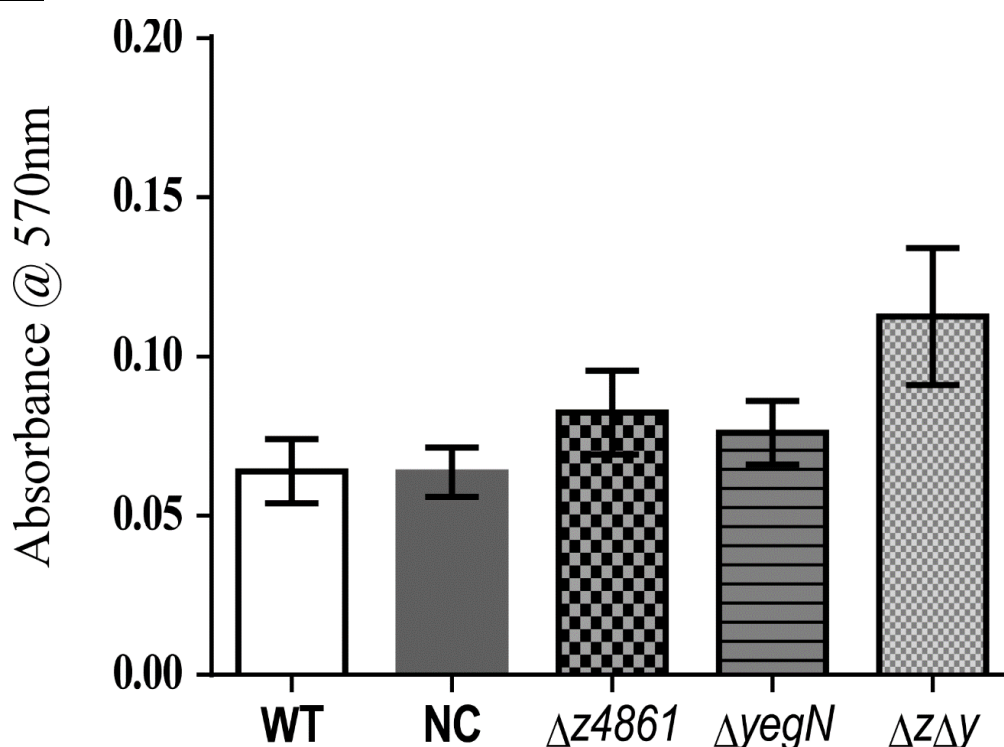**Figure S4: Biofilm assay of the five strains.**

A column plot showing the absorbance of crystal violet stained biofilm of each strain. No statistical significance was found among the strains ( $P > 0.05$ ). The significance was determined by pairwise multiple t-tests. The data presented is the mean of three independent experiments and the error bars represent the standard deviation (SD).

### References for Additional Material:

1. Latif H, Li HJ, Charusanti P, Palsson BO, Aziz RK. A gapless, unambiguous genome sequence of the enterohemorrhagic *Escherichia coli* O157:H7 strain EDL933. *Genome Announc.* 2014;2. <https://doi.org/10.1128/genomeA.00821-14>.
2. Aziz RK, Khaw VL, Monk JM, Brunk E, Lewis R, Loh SI, et al. Model-driven discovery of synergistic inhibitors against *E. coli* and *S. enterica* serovar Typhimurium targeting a novel synthetic lethal pair, *aldA* and *prpC*. *Front Microbiol.* 2015;6:958. <https://doi.org/10.3389/fmicb.2015.00958>.
3. Datsenko KA, Wanner BL. One-step inactivation of chromosomal genes in *Escherichia coli* K-12 using PCR products. *Proc Natl Acad Sci U S A.* 2000;97:6640-5. <https://doi.org/10.1073/pnas.120163297>.
4. Zhou K, Zhou L, Lim Q, Zou R, Stephanopoulos G, Too HP. Novel reference genes for quantifying transcriptional responses of *Escherichia coli* to protein overexpression by quantitative PCR. *BMC Mol Biol.* 2011;12:18. <https://doi.org/10.1186/1471-2199-12-18>.
